# Supplementary material for: Inhibition of Vps34 and p110δ PI3K Impairs Migration, Invasion and Three-Dimensional Spheroid Growth in Breast Cancer Cells
Source: MDPI journal article supplement (doi:10.3390/ijms23169008), 2022-08-12
Supplement: s1 [file s1]

## Supplementary material

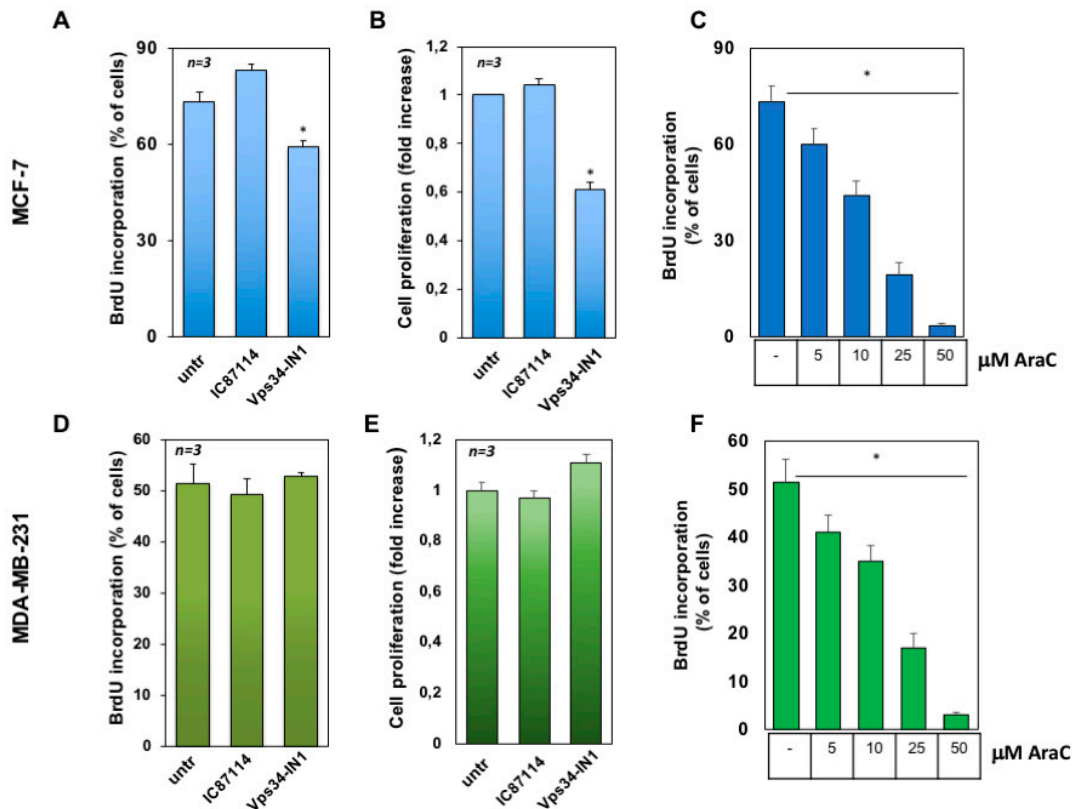

**Figure S1: Analysis of BrdU incorporation assay and proliferation in MCF-7 and MDA-MB-231 cells.**

Cycling MCF-7 (A and C) and MDA-MB-231 (D and F) cells were left untreated (untr) or treated for 14 h with the indicated inhibitors. Ara-C is the proliferation inhibitor cytosine arabinoside, as indicated in materials and methods section. Cultured cells were *in vitro* pulse-labeled with 100  $\mu$ M BrdU and its incorporation into DNA was analyzed by immunofluorescence (IF) and expressed as the percentage of total cells. In B and E, cycling MCF-7 (B) and MDA-MB-231 (E) cells were left untreated or treated for 24 h with the indicated inhibitors. Cell proliferation was assayed using the WST-1 reagent. Graphs represent the ratios of proliferation expressed as the fold increase over the basal absorbance. In A-F, Means and SEMs are shown. *n* represents the number of experiments. \**p* < 0.05 for the indicated experimental points *vs.* the corresponding untreated control.
